# Supplementary material for: Drivers of drought-induced shifts in the water balance through a Budyko approach
Source: Copernicus journal article supplement (doi:10.5194/hess-2021-55), 2021-03-29
Supplement: Supplementary file 1 [file hess-2021-55-supplement.pdf]

# Supplement

## S1 Data

Table S1: Full-natural flow gauges

| Basin       | Gauge name                         | CDEC gauge code |
|-------------|------------------------------------|-----------------|
| Shasta      | Sacramento River above Bend Bridge | SBB             |
| Feather     | Feather River at Oroville          | FTO             |
| Yuba        | Yuba River near Smartville         | YRS             |
| American    | American River at Folsom           | AMF             |
| Cosumnes    | Cosumnes River at Michigan Bar     | CSN             |
| Mokelumne   | Mokelumne - Mokelumne Hill         | MKM             |
| Stanislaus  | Stanislaus River - Goodwin         | SNS             |
| Tuolumne    | Tuolumne River - La Grange Dam     | TLG             |
| Merced      | Merced River near Merced Falls     | MRC             |
| San Joaquin | San Joaquin River below Friant     | SJF             |
| Kings       | Kings River - Pine Flat Dam        | KGF             |
| Kaweah      | Kaweah River - Terminus Dam        | KWT             |
| Kern        | Kern River - below Isabella        | KRI             |
| Tule        | Success Dam                        | SCC             |

## S2 *abcd* model results

The *abcd* model (Thomas, 1981) can be understood under a generalized proportionality hypothesis framework (Wang and Tang, 2014). The primary equation assumes PET or “evaporation opportunity”,  $Y$ , for each time step as a function of available water and two parameters,  $a$  and  $b$ . The former ranges from zero to one and can be understood physically as the tendency for runoff to occur in the basin before the soil is saturated. The latter is the maximum evaporation opportunity, measured in depth. Soil storage in the model is calculated under the assumption that actual ET from the soil occurs in proportion to PET,  $Y$ . The model goes on to separate direct runoff from groundwater recharge based on parameters  $c$  and  $d$ , allowing total streamflow and baseflow to be calculated as well. However, as the primary goal of using the *abcd* model here was calculating change in soil storage, we did not use parameters  $c$  or  $d$ . For more details on the *abcd* model and its use in conjunction with the Budyko model, see Du et al. (2016).

A basic sensitivity test was performed for the initial conditions for soil and groundwater storage, which were tested one at a time. The value and direction of shift in  $\omega$  are robust to initial values ranging between 5 and 500 mm, to reflect the order of magnitude of maximum dry-season storage water draw down that has been reported in the Sierra (Roche et al., 2020). Only in one basin, the San Joaquin, did  $\omega$  show a shift in the opposite direction for initial soil storage values of 100 and 500 mm.

Table S2: *abcd* model final calibrated parameters

| <b>Basin</b> | <b>Parameter <math>a^a</math></b> | <b>Parameter <math>b</math>, mm<sup>b</sup></b> |
|--------------|-----------------------------------|-------------------------------------------------|
| American     | 0.979                             | 1355                                            |
| Cosumnes     | 0.956                             | 1450                                            |
| Feather      | 0.944                             | 1402                                            |
| Kaweah       | 0.996                             | 782                                             |
| Kern         | 0.993                             | 759                                             |
| Kings        | 0.993                             | 670                                             |
| Merced       | 0.999                             | 1396                                            |
| Mokelumne    | 1.000                             | 1076                                            |
| SanJoaquin   | 0.983                             | 780                                             |
| Shasta       | 1.000                             | 806                                             |
| Stanislaus   | 0.985                             | 1030                                            |
| Tule         | 0.985                             | 1442                                            |
| Tuolumne     | 0.995                             | 1122                                            |
| Yuba         | 0.991                             | 1450                                            |

<sup>a</sup>Parameter  $a$  reflects the propensity of a basin to generate runoff before the soil is saturated.

<sup>b</sup>Parameter  $b$  is the maximum possible evapotranspiration per time step.

Table S3: *abcd* model performance with respect to runoff

| <b>Basin</b> | <b>Nash-Sutcliffe Efficiency</b> | <b>Runoff relative error, <math>10^{-4}</math> mm</b> |
|--------------|----------------------------------|-------------------------------------------------------|
| Shasta       | 0.772                            | 2.04                                                  |
| Feather      | 0.843                            | -6.88                                                 |
| Yuba         | 0.883                            | -0.11                                                 |
| American     | 0.870                            | -0.31                                                 |
| Cosumnes     | 0.871                            | -6.46                                                 |
| Mokelumne    | 0.902                            | 8.96                                                  |
| Stanislaus   | 0.911                            | -3.89                                                 |
| Tuolumne     | 0.894                            | -0.27                                                 |
| Merced       | 0.725                            | -325.19                                               |
| SanJoaquin   | 0.916                            | 0.06                                                  |
| Kings        | 0.883                            | 0.88                                                  |
| Kaweah       | 0.899                            | 13.34                                                 |
| Kern         | 0.489                            | -29.18                                                |
| Tule         | 0.749                            | 28.86                                                 |

### S3 Statistical significance of water balance shifts

Table S4: Results of Kolmogorov-Smirnoff tests comparing drought and non-drought distributions

| Basin       | PET/(P- $\Delta$ S) <i>p</i> -values | ET/(P- $\Delta$ S) <i>p</i> -values |
|-------------|--------------------------------------|-------------------------------------|
| Shasta      | 8.69E-05                             | 0.001987912                         |
| Feather     | 0.000456505                          | 0.024630349                         |
| Yuba        | 0.001666759                          | 0.007511255                         |
| American    | 0.000456505                          | 0.00545947                          |
| Cosumnes    | 0.000309095                          | 0.000309095                         |
| Mokelumne   | 0.000805859                          | 0.007511255                         |
| Stanislaus  | 0.000207438                          | 0.007511255                         |
| Tuolumne    | 0.000207438                          | 0.00393314                          |
| Merced      | 0.000207438                          | 0.000805859                         |
| San Joaquin | 0.000207438                          | 0.002808533                         |
| Kings       | 0.000207438                          | 0.000805859                         |
| Kaweah      | 0.000805859                          | 0.000805859                         |
| Kern        | 0.00393314                           | 0.000805859                         |
| Tule        | 9.92E-06                             | 4.79E-05                            |

### References

- Du, C., Sun, F., Yu, J., Liu, X., and Chen, Y.: New interpretation of the role of water balance in an extended Budyko hypothesis in arid regions, *Hydrology and Earth System Sciences*, 20, 393–409, <https://doi.org/10.5194/hess-20-393-2016>, 2016.
- Roche, J. W., Ma, Q., Rungee, J., and Bales, R. C.: Evapotranspiration mapping for forest management in California’s Sierra Nevada, *Frontiers for Global Change*, <https://doi.org/10.3389/ffgc.2020.00069>, 2020.
- Thomas, H. A.: Improved methods for national water assessment, water resources contract: WR15249270, Tech. rep., U.S. Geological Survey, <https://doi.org/10.3133/70046351>, 1981.
- Wang, D. and Tang, Y.: A one-parameter Budyko model for water balance captures emergent behavior in darwinian hydrologic models, *Geophysical Research Letters*, 41, 4569–4577, <https://doi.org/10.1002/2014GL060509>, 2014.
